# Supplementary material for: High correlation of VAS pain scores after 2 and 6 weeks of treatment with VAS pain scores at 12 weeks in randomised controlled trials in rheumatoid arthritis and osteoarthritis: meta-analysis and implications
Source: PubMed Central journal article supplement (PMC4818534; doi:10.1186/s13075-016-0972-7), 2016-03-31

Figure S1: N weighted - Random Intercept model: CFB 2 vs. CFB 6 weeks observed vs predicted values

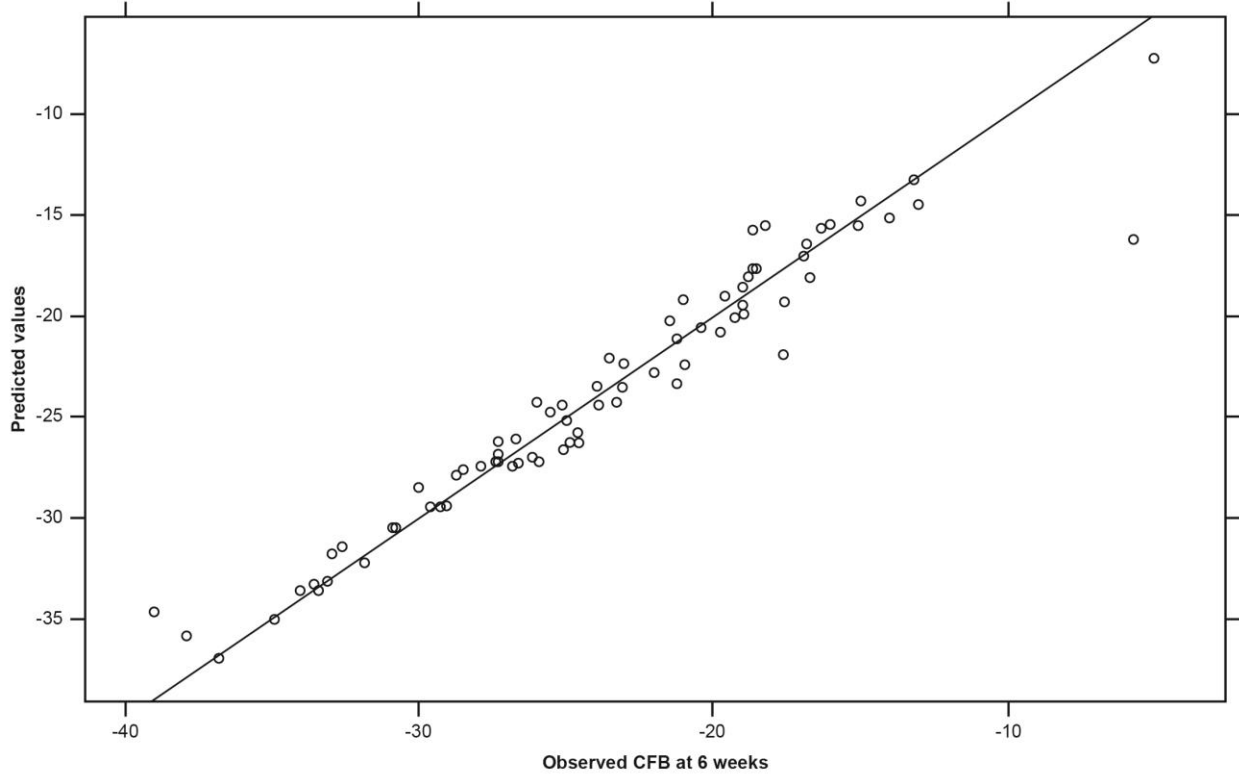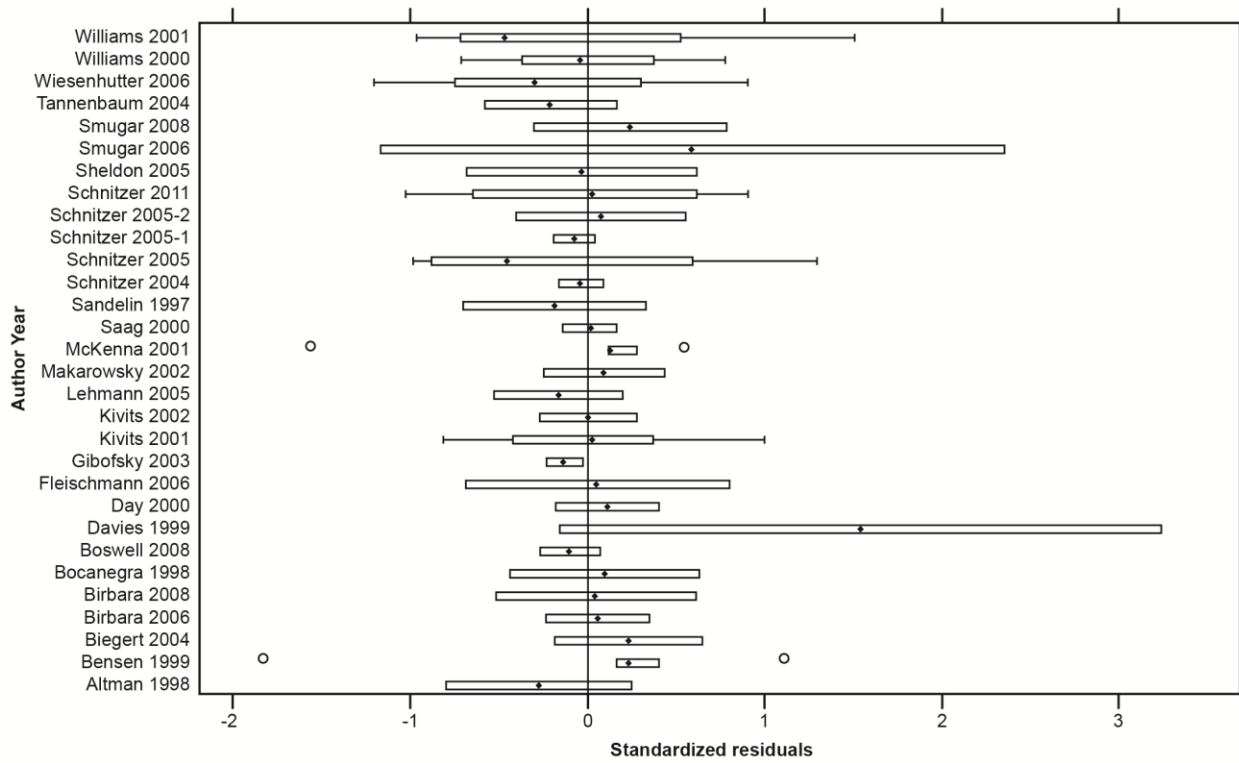

Figure S2: Precision weighted - Random Intercept model: CFB 2 vs. CFB 6 weeks observed vs predicted values and standardized residuals

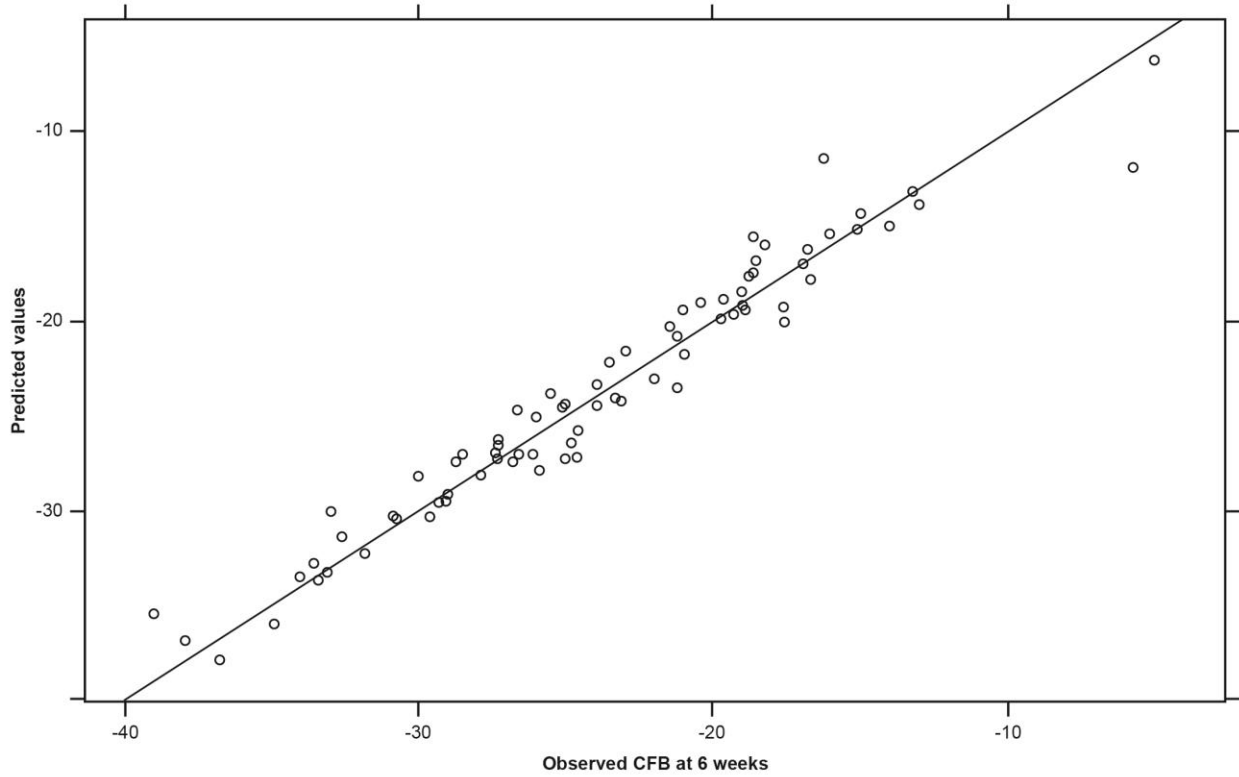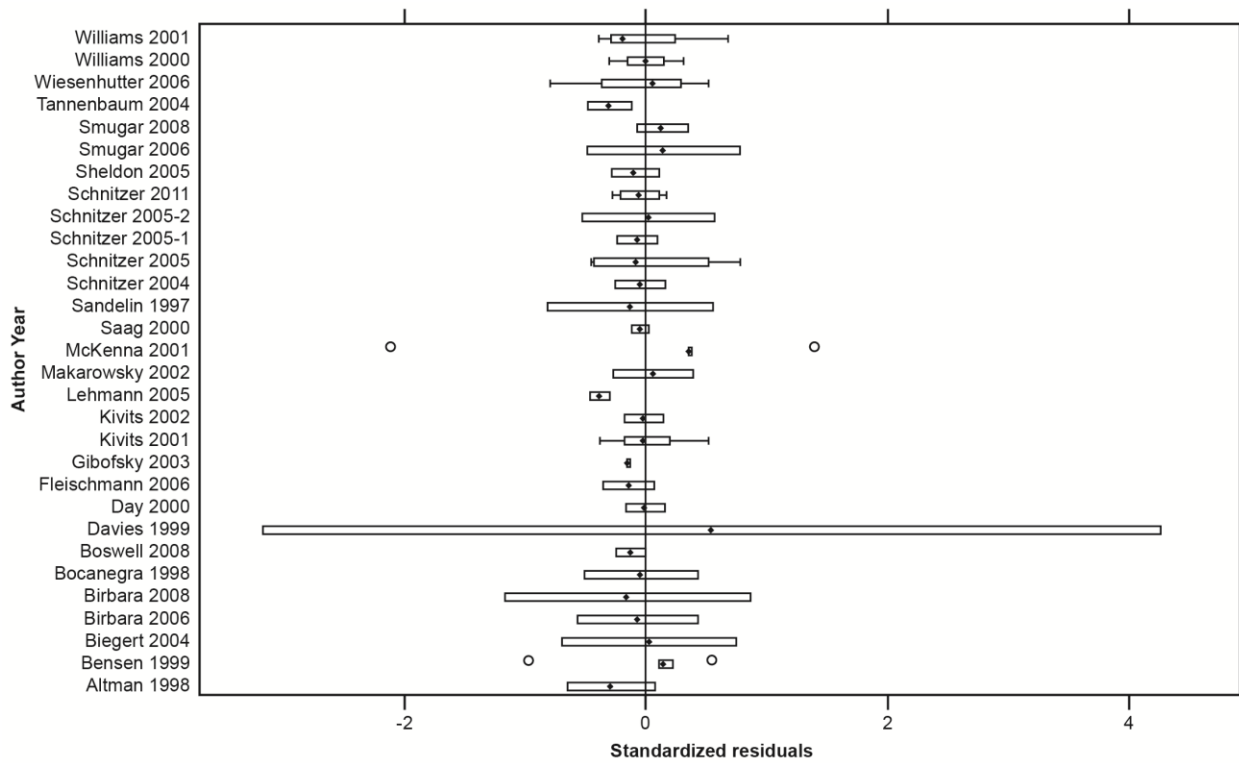

Figure S3: N weighted - Random Intercept model: CFB 2 vs. CFB 12 weeks observed vs predicted values and standardized residuals

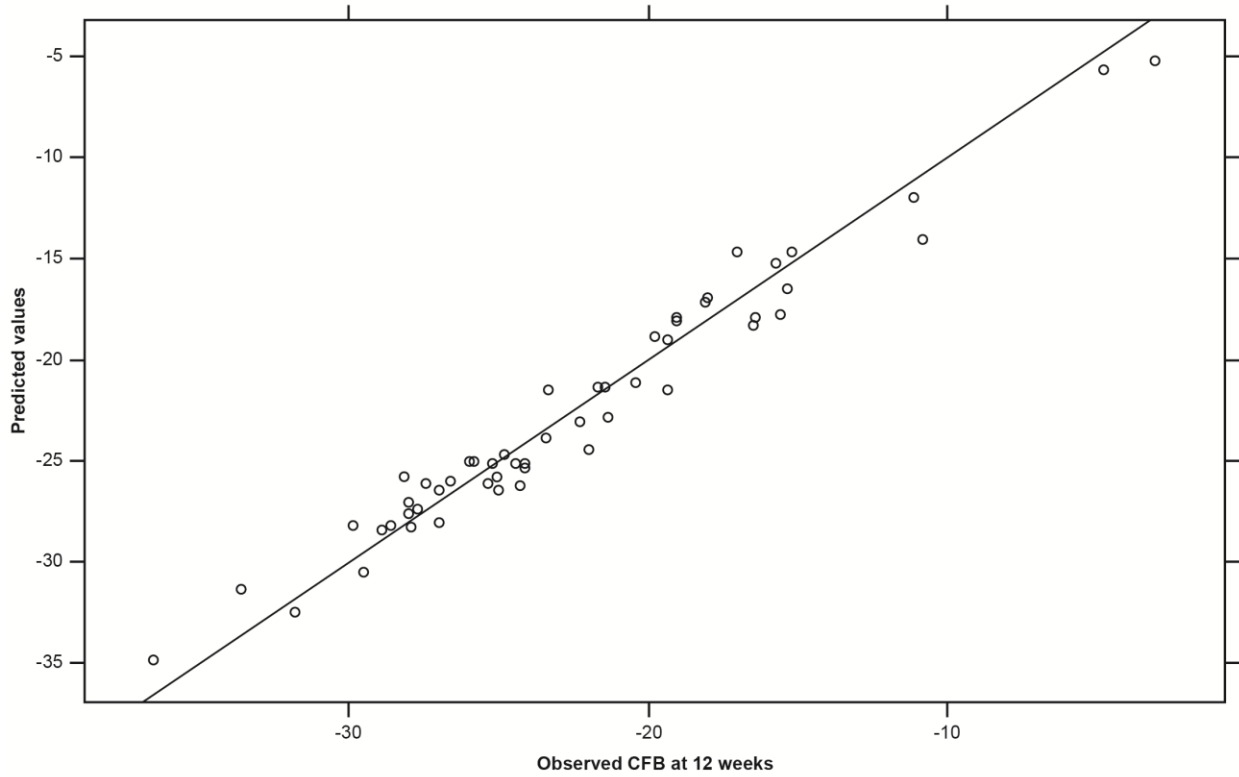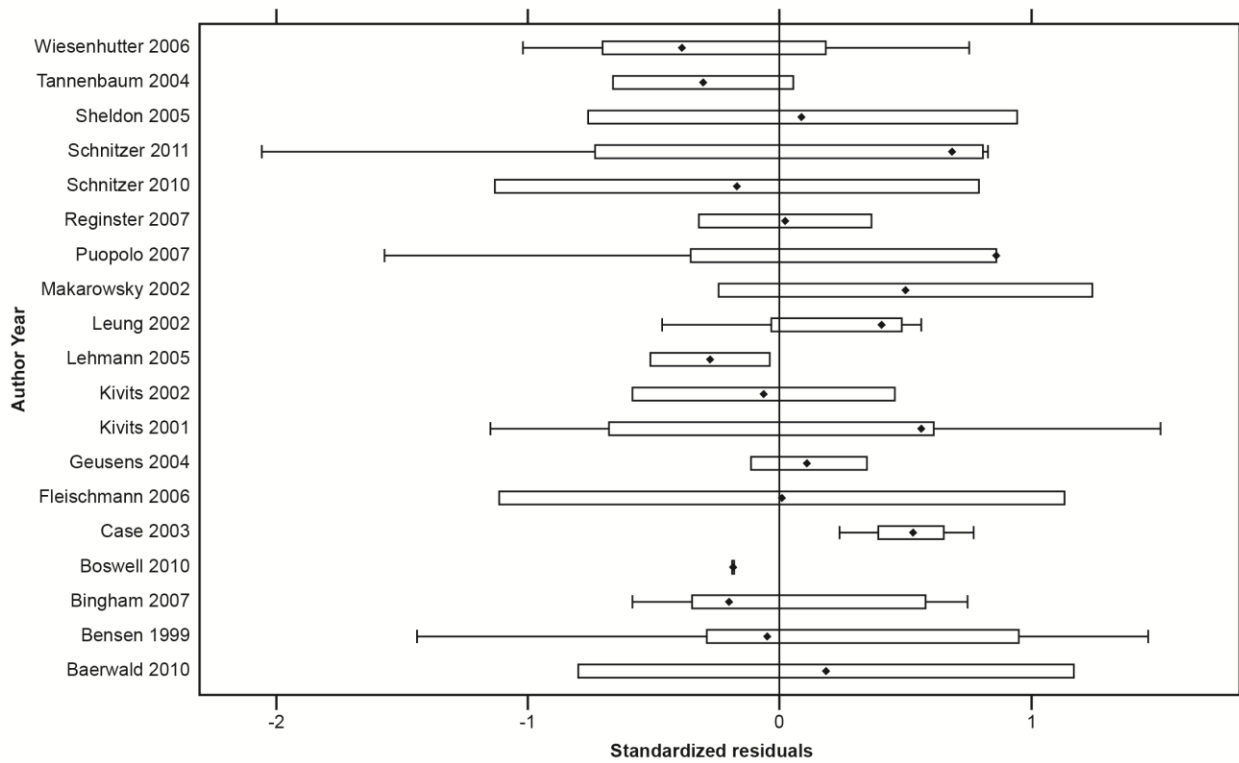

Figure S4: Precision weighted - Random Intercept model: CFB 2 vs. CFB 12 weeks observed vs predicted values and standardized residuals

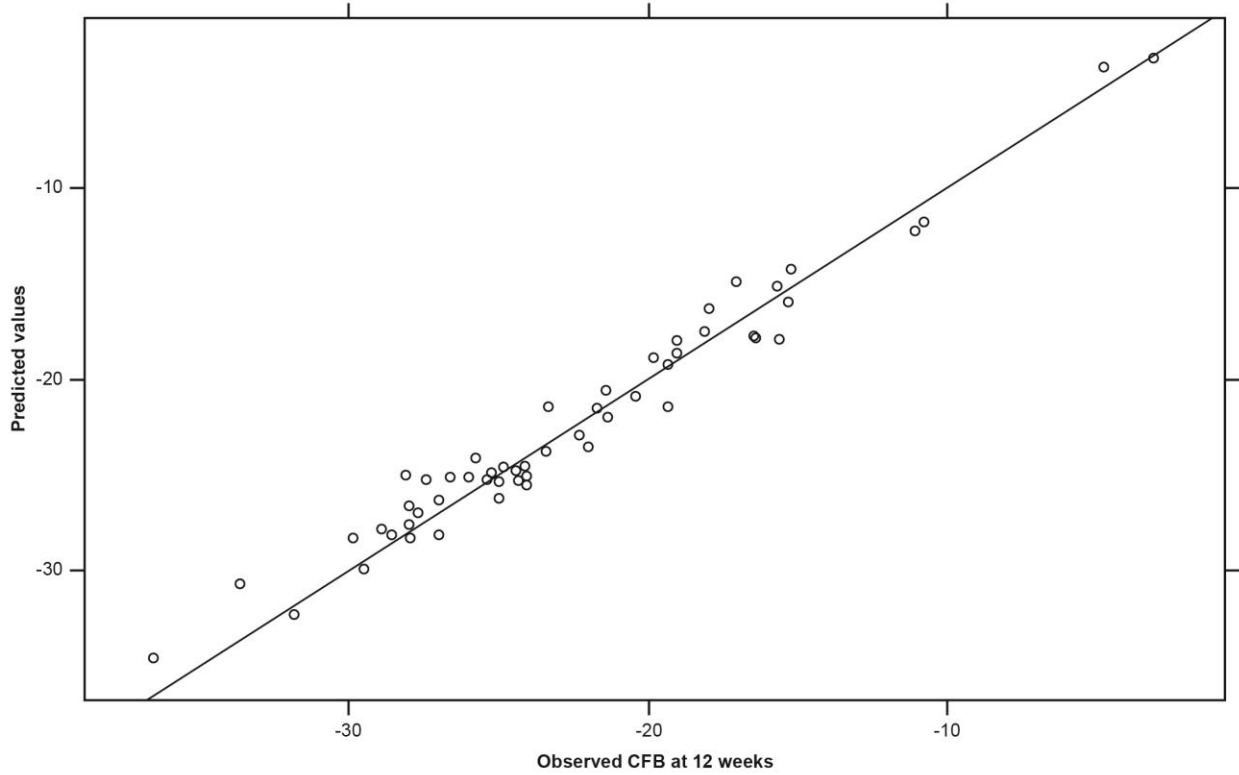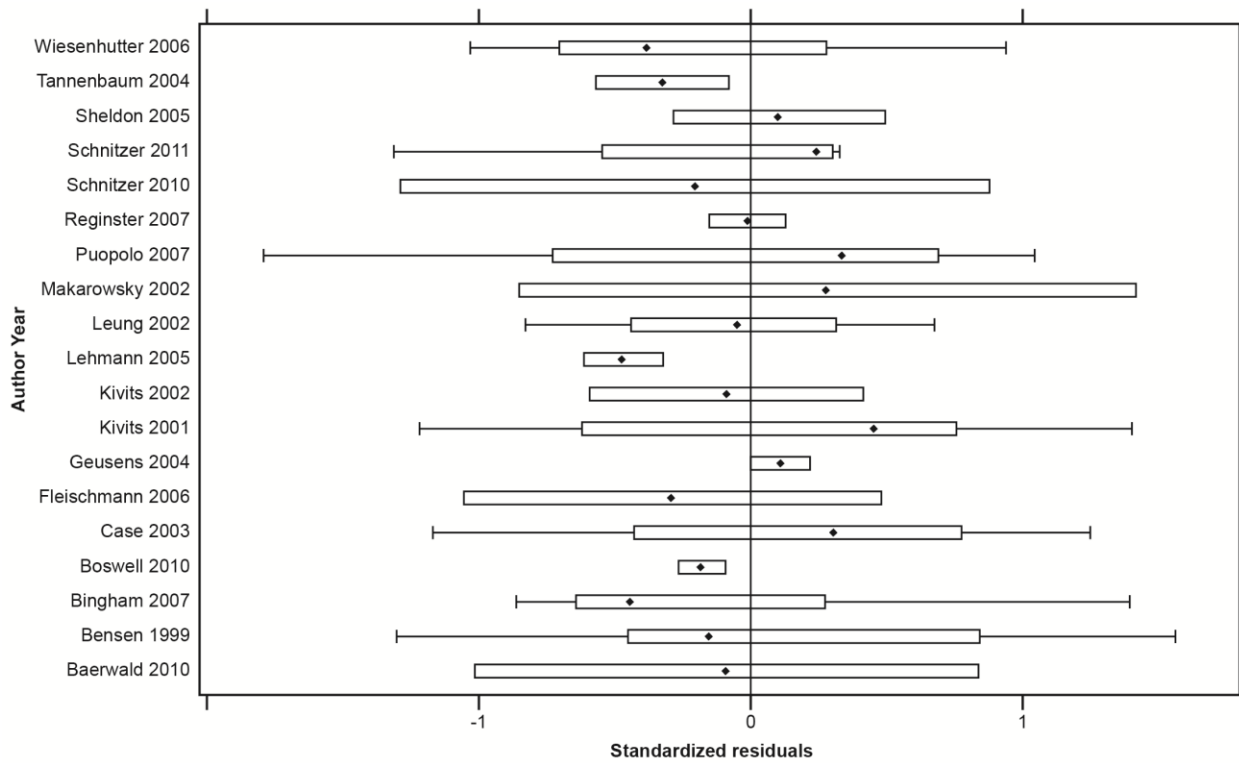

Figure S5: N weighted - Random Intercept model: CFB 6 vs. CFB 12 weeks observed vs predicted values and standardized residuals

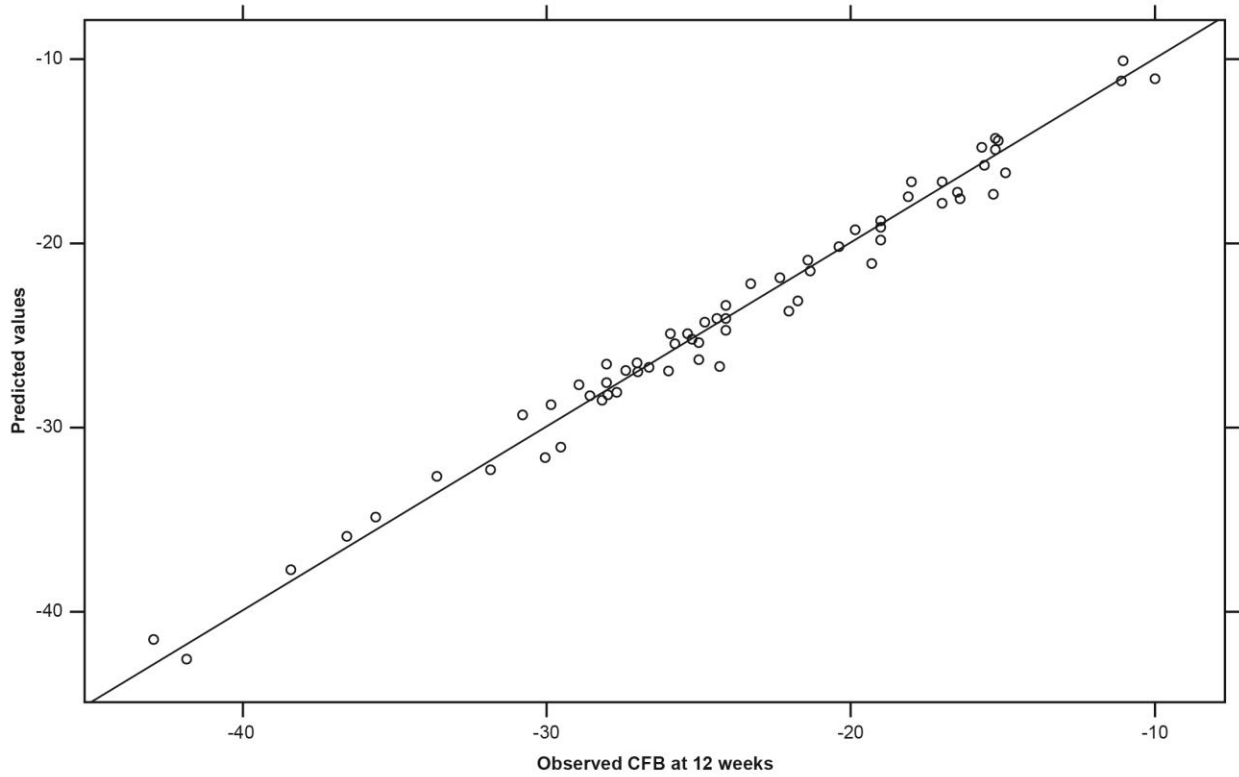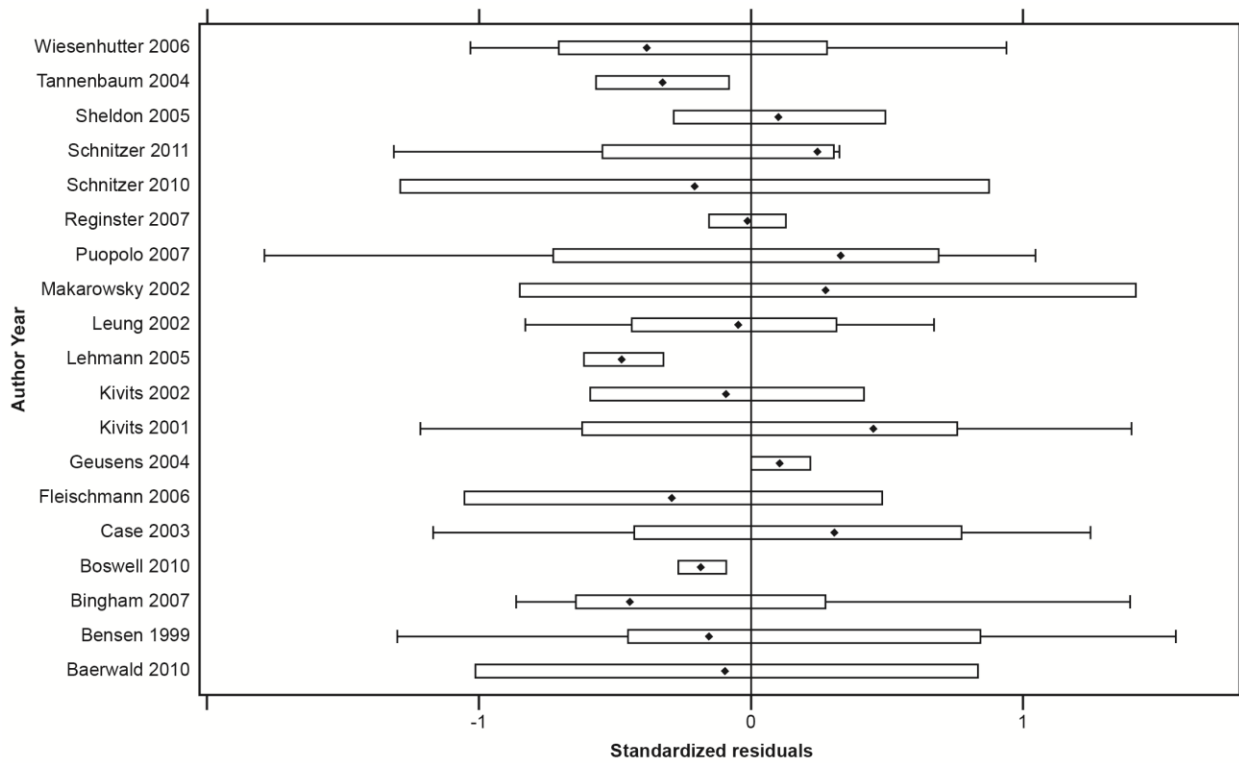

Figure S6: Precision weighted - Random Intercept model: CFB 6 vs. CFB 12 weeks observed vs predicted values and standardized residuals

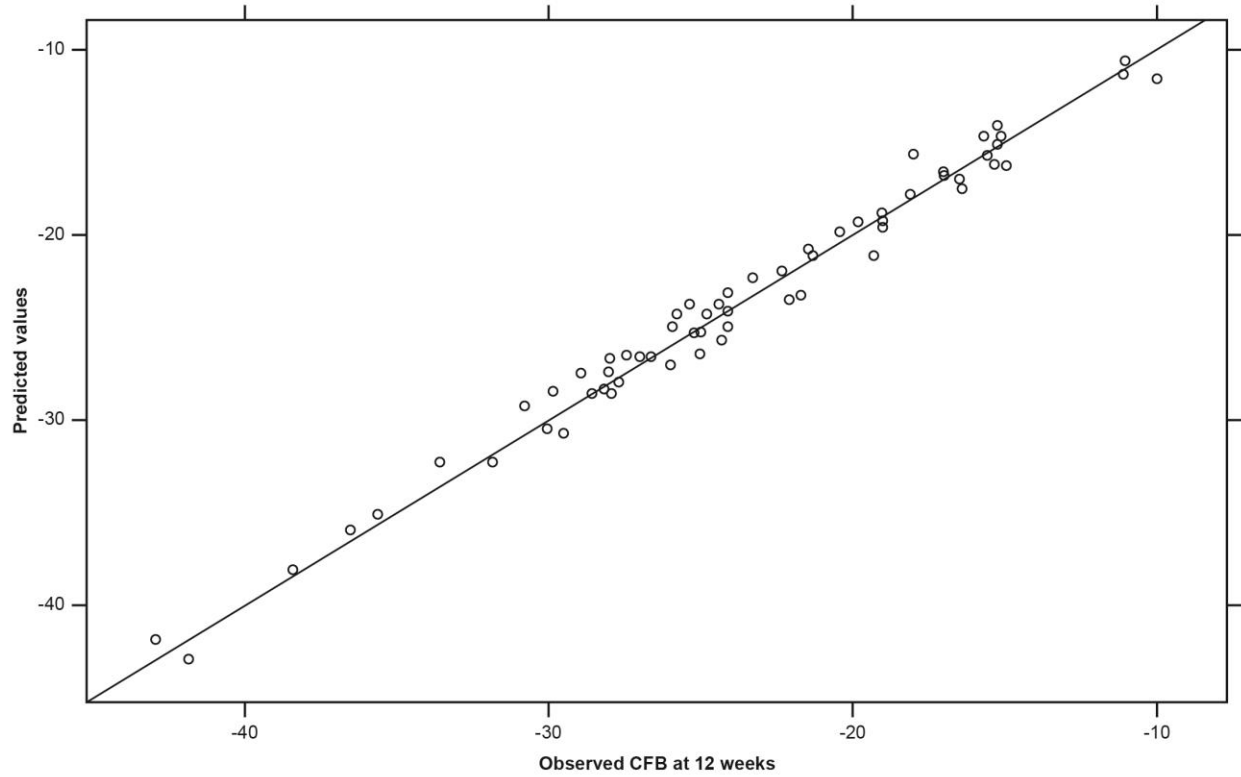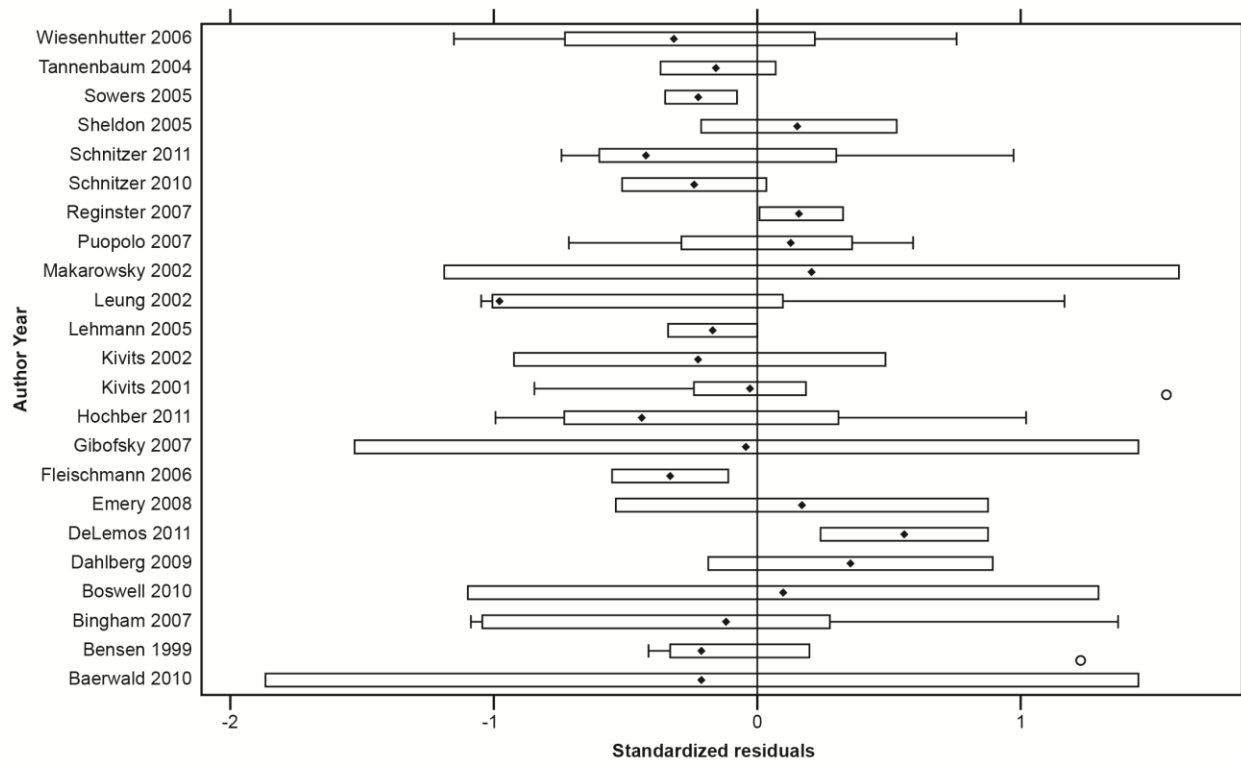

Supplement: 13075_2016_972_MOESM1_ESM.pdf [file 13075_2016_972_MOESM1_ESM.pdf]
