# Supplementary material for: High correlation of VAS pain scores after 2 and 6 weeks of treatment with VAS pain scores at 12 weeks in randomised controlled trials in rheumatoid arthritis and osteoarthritis: meta-analysis and implications
Source: PubMed Central journal article supplement (PMC4818534; doi:10.1186/s13075-016-0972-7), 2016-03-31
Supplement: 13075_2016_972_MOESM2_ESM.pdf [file 13075_2016_972_MOESM2_ESM.pdf]

| Author Year     | Trial name                                | Study design                 | Compared interventions              | Trial duration in weeks | Patient population | Jadad score out of 5 |
|-----------------|-------------------------------------------|------------------------------|-------------------------------------|-------------------------|--------------------|----------------------|
| Gibofsky 2003   | NR                                        | RCT, DB, PC, MC              | Celecoxib, 200mg/d, oral, OD        | 6                       | OA                 | 5                    |
|                 |                                           |                              | Placebo                             |                         |                    |                      |
| Reginster 2007  | NR                                        | RCT, PC, AC, DB, MC, DD, PG, | Etoricoxib, 60mg/d, oral, OD        | 12 PC - 40 AC (*1)      | OA                 | 5                    |
|                 |                                           |                              | Naproxen, 1000mg/d, oral, BID       |                         |                    |                      |
| Bingham 2007    | Protocol 076 (Study 1)                    | RCT, PC, DB, MC, DD          | Etoricoxib, 30mg/d, oral, OD        | 12 PC - 14 AC (*2)      | OA                 | 3                    |
|                 |                                           |                              | Celecoxib, 200mg/d, oral, OD        |                         |                    |                      |
|                 |                                           |                              | Placebo                             |                         |                    |                      |
|                 | Protocol 077 (Study 2)                    | RCT, PC, DB, MC, DD          | Etoricoxib, 30mg/d, oral, OD        | 12 PC - 14 AC (*2)      | OA                 |                      |
|                 |                                           |                              | Celecoxib, 200mg/d, oral, OD        |                         |                    |                      |
|                 |                                           |                              | Placebo                             |                         |                    |                      |
| Baerwald 2010   | NR                                        | RCT, DB, PG, PC, AC, MC      | Naproxen, 1000mg/d, oral, BID       | 13                      | OA                 | 3                    |
|                 |                                           |                              | Placebo                             |                         |                    |                      |
| Day 2000        | NR                                        | RCT, DB, MC                  | Ibuprofen, 2400mg/d, oral, TID      | 6                       | OA                 | 5                    |
|                 |                                           |                              | Placebo                             |                         |                    |                      |
| Schnitzer 2005a | NR                                        | RCT, DB, PG, PC              | Naproxen, 1000mg/d, oral, BID       | 6                       | OA                 | 5                    |
|                 |                                           |                              | Placebo                             |                         |                    |                      |
| Schnitzer 2005b | VACT-1 and VACT-2 (Protocols 106 and 150) | RCT, DB, AC, MC              | Celecoxib, 200 mg/d, oral, OD       | 6                       | OA                 | 5                    |
|                 |                                           |                              | Acetaminophen, 4000 mg/d, oral, QID |                         |                    |                      |
| Sowers 2005     | NR                                        | RCT, DB, AC, MC              | Celecoxib 200mg/d, oral, OD         | 12                      | OA                 | 3                    |
|                 |                                           |                              | Naproxen 1000mg/d, oral, BID        |                         |                    |                      |
| Schnitzer 2004b | NR                                        | RCT, PC, DB, DD, PG, MC      | Diclofenac, 150mg/d, oral, BID      | 4                       | OA                 | 3                    |

|                 |                        |                         |                                                     |    |                                  |   |
|-----------------|------------------------|-------------------------|-----------------------------------------------------|----|----------------------------------|---|
|                 |                        |                         | Placebo                                             |    |                                  |   |
| Tannenbaum 2004 | NR                     | RCT, PC, AC, DB, MC     | Celecoxib, 200mg/d, oral, OD                        | 13 | OA                               | 4 |
|                 |                        |                         | Placebo                                             |    |                                  |   |
| Schnitzer 2010  | NR                     | RCT, AC, PC, DB, MC, PG | Naproxen, 1000mg/d, oral, BID                       | 13 | OA                               | 3 |
|                 |                        |                         | Placebo                                             |    |                                  |   |
| Dahlberg 2009   | NR                     | RCT, DB, MC             | Celecoxib, 200mg/d, oral, OD                        | 52 | OA                               | 5 |
|                 |                        |                         | Diclofenac, 100mg/d, oral, BID                      |    |                                  |   |
| Schnitzer 2011b | NR                     | RCT, PC, DB, MC         | Naproxen, 1000 mg/d, oral, BID                      | 53 | OA                               | 3 |
|                 |                        |                         | Placebo and after 13 weeks, naproxinod 375mg/d, BID |    |                                  |   |
|                 |                        |                         | Placebo and after 13 weeks, naproxinod 750mg/d, BID |    |                                  |   |
| Schnitzer 2011a | NCT00154219            | RCT, AC, PC, DB, MC     | Celecoxib, 200mg/d, oral, OD                        | 13 | OA                               | 5 |
|                 |                        |                         | Placebo                                             |    |                                  |   |
| Smugar 2006     | Study 1 (Protocol 112) | RCT, AC, PC, DB, PG, MC | Celecoxib, 200mg/d, oral, OD                        | 6  | OA                               | 2 |
|                 |                        |                         | Placebo                                             |    |                                  |   |
|                 | Study 2 (Protocol 116) | RCT, AC, PC, DB, PG, MC | Celecoxib, 200mg/d, oral, OD                        | 6  | OA                               |   |
|                 |                        |                         | Placebo                                             |    |                                  |   |
| Emery 2008      | NR                     | RCT, DB, DD, PG         | Celecoxib, 200mg/d, oral, OD                        | 12 | OA (requiring joint replacement) | 5 |
|                 |                        |                         | Diclofenac, 150mg/d, oral, TID                      |    |                                  |   |
| Gibofsky 2007   | NR                     | RCT, MC, PC, DB         | Naproxen 1000mg/d, oral, BID                        | 12 | RA                               | 4 |
|                 |                        |                         | Placebo                                             |    |                                  |   |
| McKenna 2001a   | NR                     | RCT, DB, PC, MC, PG     | Celecoxib, 200mg/d, oral, BID                       | 6  | OA                               | 3 |

|                       |                                      |                     |                                                |    |    |   |
|-----------------------|--------------------------------------|---------------------|------------------------------------------------|----|----|---|
|                       |                                      |                     | Diclofenac 150mg/d, oral, TID                  |    |    |   |
|                       |                                      |                     | Placebo                                        |    |    |   |
| McKenna 2001b         | NR                                   | RCT, DB, PC, MC     | Celecoxib, 200mg/d, oral, OD                   | 6  | OA | 4 |
|                       |                                      |                     | Placebo                                        |    |    |   |
| Williams 2000         | NR                                   | RCT, DB, PC, PG, MC | Celecoxib, 200mg/d, oral, BID                  | 6  | OA | 4 |
|                       |                                      |                     | Celecoxib, 200mg/d, oral, OD                   |    |    |   |
|                       |                                      |                     | Placebo                                        |    |    |   |
| Bocanegra 1998        | Arthrotec Osteoarthritis Study Group | RCT, DB, PC, PG, MC | Diclofenac sodium, 150mg/d, oral, BID          | 6  | OA | 3 |
|                       |                                      |                     | Placebo                                        |    |    |   |
| Wiesenhutter 2005     | Protocol 071                         | RCT, DB, PC, AC, MC | Etoricoxib, 30mg/d, oral, OD                   | 12 | OA | 4 |
|                       |                                      |                     | Ibuprofen, 2400mg/d, oral, TID                 |    |    |   |
|                       |                                      |                     | Placebo                                        |    |    |   |
| Sheldon 2005          | NR                                   | RCT, PC, DB, DD, PG | Celecoxib, 200mg/d, oral, OD                   | 13 | OA | 4 |
|                       |                                      |                     | Placebo                                        |    |    |   |
| Biegert 2004          | NR                                   | RCT, DB, PC, MC, PG | Diclofenac, 100mg/d, oral, BID, enteric coated | 6  | OA | 5 |
|                       |                                      |                     | Placebo                                        |    |    |   |
| Zhao 1999/Bensen 1999 | NR                                   | RCT, DB, MC, PC, PG | Celecoxib, 100mg/d, oral, BID                  | 12 | OA | 3 |
|                       |                                      |                     | Celecoxib, 200mg/d, oral, BID                  |    |    |   |
|                       |                                      |                     | Celecoxib, 400mg/d, oral, BID                  |    |    |   |
|                       |                                      |                     | Naproxen, 1000mg/d, oral, BID                  |    |    |   |
|                       |                                      |                     | Placebo                                        |    |    |   |
| DeLemos 2011          | NR                                   | RCT, PC, DB, MC     | Celecoxib 200 mg/d, oral, OD                   | 12 | OA | 4 |
|                       |                                      |                     | Placebo                                        |    |    |   |

|                          |                                           |                            |                                |    |    |   |
|--------------------------|-------------------------------------------|----------------------------|--------------------------------|----|----|---|
| Fleischmann 2005         | NR                                        | RCT, PC, DB, DD,<br>MC, PG | Celecoxib, 200mg/d, oral, OD   | 13 | OA | 5 |
|                          |                                           |                            | Placebo                        |    |    |   |
| Davies 1999              | NR                                        | RCT, PC, DB, PG,<br>MC     | Ibuprofen, 2400mg/d, oral, TID | 4  | OA | 2 |
|                          |                                           |                            | Placebo                        |    |    |   |
| Lehmann 2005             | NR                                        | RCT, PC, DB, DD,<br>MC     | Celecoxib, 200mg/d, oral, OD   | 13 | OA | 5 |
|                          |                                           |                            | Placebo                        |    |    |   |
| Altman 1998              | NR                                        | RCT, PC, DB, DD,<br>PG, MC | Naproxen, 1000mg/d, oral, BID  | 26 | OA | 4 |
|                          |                                           |                            | Placebo                        |    |    |   |
| Puopolo 2007             | NR                                        | RCT, PC, AC, DB,<br>MC     | Etoricoxib, 30mg/d, oral, OD   | 12 | OA | 5 |
|                          |                                           |                            | Ibuprofen, 2400mg/d, oral, TID |    |    |   |
|                          |                                           |                            | Placebo                        |    |    |   |
| Hochberg 2011/Cryer 2011 | Study 307<br>(PN400-307 -<br>NCT00664560) | RCT, PC, DB, PG,<br>MC     | Celecoxib, 200mg/d, oral, OD   | 12 | OA | 5 |
|                          |                                           |                            | Placebo                        |    |    |   |
|                          | Study 309<br>(PN400-309 -<br>NCT00665431) | RCT, PC, DB, PG,<br>MC     | Celecoxib, 200 mg/d, oral, OD  | 12 | OA |   |
|                          |                                           |                            | Placebo                        |    |    |   |
| Williams 2001            | NR                                        | RCT, PC, DB, PG,<br>MC     | Celecoxib, 200mg/d, oral, BID  | 6  | OA | 4 |
|                          |                                           |                            | Celecoxib, 200mg/d, oral, OD   |    |    |   |
|                          |                                           |                            | Placebo                        |    |    |   |
| Leung 2002               | NR                                        | RCT, PC, AC DB,<br>MC      | Etoricoxib, 60mg, oral, OD     | 12 | OA | 5 |
|                          |                                           |                            | Naproxen, 1000mg/d, oral, BID  |    |    |   |
|                          |                                           |                            | Placebo                        |    |    |   |
| Makarowski 2002          | NR                                        | RCT, PC, DB, MC,<br>PG     | Naproxen, 100mg/d, oral, BID   | 12 | OA | 4 |
|                          |                                           |                            | Placebo                        |    |    |   |

|                   |                                    |                         |                                                                      |    |    |   |
|-------------------|------------------------------------|-------------------------|----------------------------------------------------------------------|----|----|---|
| Kivitz 2001       | NR                                 | RCT, PC, DB, MC, PG     | Celecoxib, 100mg/d, oral, BID                                        | 12 | OA | 4 |
|                   |                                    |                         | Celecoxib, 200mg/d, oral, BID                                        |    |    |   |
|                   |                                    |                         | Celecoxib, 400mg/d, oral, BID                                        |    |    |   |
|                   |                                    |                         | Naproxen, 1000mg/d, oral, BID                                        |    |    |   |
|                   |                                    |                         | Placebo                                                              |    |    |   |
| Boswell 2008      | Study A<br>(GSK protocol CXA20005) | RCT, PC, AC, DB, MC, PG | Celecoxib, 200mg/d, oral, OD                                         | 6  | OA | 3 |
|                   |                                    |                         | Placebo                                                              |    |    |   |
|                   | Study B<br>(GSK protocol CXA30007) |                         | Celecoxib, 200mg/d, oral, OD                                         |    |    |   |
|                   |                                    |                         | Placebo                                                              |    |    |   |
| Sandelin 1997     | NR                                 | RCT, PC, DB, MC         | Diclofenac, 100mg/d, oral, BID, combined with placebo gel, 9g/d, TID | 4  | OA | 5 |
|                   |                                    |                         | Placebo gel and tablet                                               |    |    |   |
| Birbara 2006      | NR (Study 1)                       | RCT, PC, DB, MC, PG     | Celecoxib, 200mg/d, oral, OD                                         | 6  | OA | 5 |
|                   |                                    |                         | Placebo                                                              |    |    |   |
|                   | NR (Study 2)                       | RCT, PC, DB, MC, PG     | Celecoxib, 200mg/d, oral, OD                                         | 6  | OA |   |
|                   |                                    |                         | Placebo                                                              |    |    |   |
| Case 2003         | NR                                 | RCT, DB, PC, SC         | Diclofenac sodium, 150 mg/d, oral, BID                               | 12 | OA | 4 |
|                   |                                    |                         | Acetaminophen, 4000 mg/d, oral, QID                                  |    |    |   |
|                   |                                    |                         | Placebo                                                              |    |    |   |
| Schnitzer 2005c-1 | NR                                 | RCT, PC, DB, MC         | Diclofenac, 150 mg/d, oral, BID                                      | 4  | OA | 4 |
|                   |                                    |                         | Placebo                                                              |    |    |   |
| Schnitzer 2005c-2 | NR                                 | RCT, PC, DB, MC         | Diclofenac, 150 mg/d, oral, BID                                      | 4  | RA |   |
|                   |                                    |                         | Placebo                                                              |    |    |   |

|              |    |                             |                                |    |    |   |
|--------------|----|-----------------------------|--------------------------------|----|----|---|
| Kivitz 2002  | NR | RCT, DB, PC, MC             | Naproxen, 1000 mg/d, oral, BID | 12 | OA | 3 |
|              |    |                             | Placebo                        |    |    |   |
| Geusens 2004 | NR | RCT, DB, DD, PC, AC, PG, MC | Naproxen, 1000mg/d, oral, BID  | 26 | RA | 4 |
|              |    |                             | Placebo                        |    |    |   |
| Saag 2000    | NR | RCT, DB, PC, AC,            | Ibuprofen, 2400mg/d, oral, TID | 6  | OA | 5 |
|              |    |                             | Placebo                        |    |    |   |
