# Supplementary material for: High correlation of VAS pain scores after 2 and 6 weeks of treatment with VAS pain scores at 12 weeks in randomised controlled trials in rheumatoid arthritis and osteoarthritis: meta-analysis and implications
Source: PubMed Central journal article supplement (PMC4818534; doi:10.1186/s13075-016-0972-7), 2016-03-31
Supplement: 13075_2016_972_MOESM3_ESM.pdf [file 13075_2016_972_MOESM3_ESM.pdf]

| Author Year     | Trial name             | Compared interventions         | N [randomized patients] | Age in years [mean] | Gender [% Male] | Duration of disease in years [Mean] | Hypertension [%] | Current smoker [%] | History of GI ulcer [%] | Gastro-protective agent use allowed [yes/no] | Aspirin use allowed [yes/no] | Rescue medication use allowed [yes/no] |
|-----------------|------------------------|--------------------------------|-------------------------|---------------------|-----------------|-------------------------------------|------------------|--------------------|-------------------------|----------------------------------------------|------------------------------|----------------------------------------|
| Gibofsky 2003   | NR                     | Celecoxib, 200mg/d, oral, OD   | 189                     | 62                  | 31%             | 9                                   | NR               | NR                 | 6%                      | No                                           | Yes                          | Yes                                    |
|                 |                        | Placebo                        | 98                      | 63                  | 35%             | 8                                   |                  |                    | 6%                      |                                              |                              |                                        |
| Reginster 2007  | NR                     | Etoricoxib, 60mg/d, oral, OD   | 446                     | 63                  | 28%             | NR                                  | NR               | NR                 | NR                      | Yes                                          | Yes                          | Yes                                    |
|                 |                        | Naproxen, 1000mg/d, oral, BID  | 439                     | 63                  | 29%             |                                     |                  |                    |                         |                                              |                              |                                        |
| Bingham 2007    | Protocol 076 (Study 1) | Etoricoxib, 30mg/d, oral, OD   | 231                     | 62                  | 34%             | NR                                  | NR               | NR                 | NR                      | NR                                           | Yes                          | Yes                                    |
|                 |                        | Celecoxib, 200mg/d, oral, OD   | 241                     | 63                  | 30%             |                                     |                  |                    |                         |                                              |                              |                                        |
|                 |                        | Placebo                        | 127                     | 63                  | 35%             |                                     |                  |                    |                         |                                              |                              |                                        |
|                 | Protocol 077 (Study 2) | Etoricoxib, 30mg/d, oral, OD   | 244                     | 62                  | 30%             | NR                                  | NR               | NR                 | NR                      | NR                                           | Yes                          | Yes                                    |
|                 |                        | Celecoxib, 200mg/d, oral, OD   | 247                     | 62                  | 38%             |                                     |                  |                    |                         |                                              |                              |                                        |
|                 |                        | Placebo                        | 117                     | 61                  | 35%             |                                     |                  |                    |                         |                                              |                              |                                        |
| Baerwald 2010   | NR                     | Naproxen, 1000mg/d, oral, BID  | 156                     | 62                  | 32%             | NR                                  | 48%              | NR                 | EC                      | NR                                           | Yes                          | Yes                                    |
|                 |                        | Placebo                        | 331                     | 63                  | 37%             |                                     | 54%              |                    |                         |                                              |                              |                                        |
| Day 2000        | NR                     | Ibuprofen, 2400mg/d, oral, TID | 249                     | 64                  | 22%             | 9                                   | NR               | NR                 | EC                      | NR                                           | No                           | Yes                                    |
|                 |                        | Placebo                        | 74                      | 63                  | 15%             | 9                                   |                  |                    | EC                      |                                              |                              |                                        |
| Schnitzer 2005a | NR                     | Naproxen, 1000mg/d, oral, BID  | 117                     | 60                  | 39%             | NR                                  | NR               | NR                 | EC                      | NR                                           | NR                           | Yes                                    |
|                 |                        | Placebo                        | 104                     | 61                  | 38%             |                                     |                  |                    |                         |                                              |                              |                                        |

|                 |                                           |                                                     |     |    |     |        |      |    |    |    |     |     |
|-----------------|-------------------------------------------|-----------------------------------------------------|-----|----|-----|--------|------|----|----|----|-----|-----|
| Schnitzer 2005b | VACT-1 and VACT-2 (Protocols 106 and 150) | Celecoxib, 200 mg/d, oral, OD                       | 523 | 61 | 32% | NR     | 43%  | NR | NR | NR | No  | NR  |
|                 |                                           | Acetaminophen , 4000 mg/d, oral, QID                | 269 | 62 | 34% |        |      |    |    |    |     |     |
| Sowers 2005     | NR                                        | Celecoxib 200mg/d, oral, OD                         | 136 | 62 | 38% | NR     | 100% | NR | NR | NR | Yes | NR  |
|                 |                                           | Naproxen 1000mg/d, oral, BID                        | 130 | 64 | 40% |        | 100% |    |    |    |     |     |
| Schnitzer 2004b | NR                                        | Diclofenac, 150mg/d, oral, BID                      | 94  | 60 | 32% | 6      | NR   | NR | EC | No | NR  | Yes |
|                 |                                           | Placebo                                             | 97  | 62 | 33% | 8      |      |    |    |    |     |     |
| Tannenbaum 2004 | NR                                        | Celecoxib, 200mg/d, oral, OD                        | 481 | 64 | 31% | 5 (*1) | NR   | NR | NR | NR | Yes | Yes |
|                 |                                           | Placebo                                             | 243 | 65 | 33% | 4 (*1) |      |    |    |    |     |     |
| Schnitzer 2010  | NR                                        | Naproxen, 1000mg/d, oral, BID                       | 227 | 61 | 32% | NR     | 48%  | NR | EC | NR | Yes | Yes |
|                 |                                           | Placebo                                             | 221 | 61 | 28% |        | 51%  |    |    |    |     |     |
| Dahlberg 2009   | NR                                        | Celecoxib, 200mg/d, oral, OD                        | 463 | 71 | 32% | NR     | NR   | NR | EC | No | Yes | Yes |
|                 |                                           | Diclofenac, 100mg/d, oral, BID                      | 462 | 71 | 31% |        |      |    |    |    |     |     |
| Schnitzer 2011b | NR                                        | Naproxen, 1000 mg/d, oral, BID                      | 254 | 60 | 30% | NR     | 51%  | NR | EC | NR | Yes | Yes |
|                 |                                           | Placebo and after 13 weeks, naproxinod 375mg/d, BID | 123 | 60 | 30% |        | 56%  |    |    |    |     |     |
|                 |                                           | Placebo and after 13 weeks, naproxinod 750mg/d, BID | 134 | 60 | 25% |        | 42%  |    |    |    |     |     |
| Schnitzer 2011a | NCT00154219                               | Celecoxib, 200mg/d, oral, OD                        | 419 | 62 | 39% | 4      | NR   | NR | EC | NR | NR  | Yes |
|                 |                                           | Placebo                                             | 416 | 61 | 39% | 4      |      |    |    |    |     |     |
| Smugar 2006     | Study 1                                   | Celecoxib, 200mg/d, oral, OD                        | 456 | 62 | 33% | NR     | NR   | NR | NR | No | Yes | Yes |

|                   |                                      |                                       |     |    |     |    |     |    |      |     |     |     |
|-------------------|--------------------------------------|---------------------------------------|-----|----|-----|----|-----|----|------|-----|-----|-----|
|                   |                                      | Placebo                               | 150 | 62 | 31% |    |     |    |      |     |     |     |
|                   | Study 2                              | Celecoxib, 200mg/d, oral, OD          | 460 | 62 | 34% | NR | NR  | NR | NR   | No  | Yes | Yes |
|                   |                                      | Placebo                               | 151 | 63 | 33% |    |     |    |      |     |     |     |
| Emery 2008        | NR                                   | Celecoxib, 200mg/d, oral, OD          | 69  | 63 | 52% | NR | NR  | NR | EC   | No  | Yes | Yes |
|                   |                                      | Diclofenac, 150mg/d, oral, TID        | 72  | 65 | 56% |    |     |    |      |     |     |     |
| Gibofsky 2007     | NR                                   | Naproxen 1000mg/d, oral, BID          | 167 | 57 | 29% | 10 | NR  | NR | EC   | NR  | Yes | Yes |
|                   |                                      | Placebo                               | 171 | 56 | 16% | 12 |     |    |      |     |     |     |
| McKenna 2001a     | NR                                   | Celecoxib, 200mg/d, oral, BID         | 201 | 62 | 32% | 8  | NR  | NR | 8%   | NR  | Yes | NR  |
|                   |                                      | Diclofenac 150mg/d, oral, TID         | 199 | 63 | 28% | 9  |     |    | 6%   |     |     |     |
|                   |                                      | Placebo                               | 200 | 60 | 34% | 9  |     |    | 9%   |     |     |     |
| McKenna 2001b     | NR                                   | Celecoxib, 200mg/d, oral, OD          | 63  | 62 | 33% | 11 | NR  | NR | 10%  | No  | Yes | NR  |
|                   |                                      | Placebo                               | 60  | 63 | 25% | 12 |     |    | 12%  |     |     |     |
| Williams 2000     | NR                                   | Celecoxib, 200mg/d, oral, BID         | 232 | 63 | 33% | 9  | NR  | NR | EC   | NR  | Yes | Yes |
|                   |                                      | Celecoxib, 200mg/d, oral, OD          | 231 | 63 | 33% | 9  |     |    |      |     |     |     |
|                   |                                      | Placebo                               | 223 | 63 | 34% | 9  |     |    |      |     |     |     |
| Bocanegra 1998    | Arthrotec Osteoarthritis Study Group | Diclofenac sodium, 150mg/d, oral, BID | 154 | 63 | 29% | 12 | NR  | NR | 100% | NR  | NR  | NR  |
|                   |                                      | Placebo                               | 91  | 62 | 32% | 11 |     |    |      |     |     |     |
| Wiesenhutter 2005 | Protocol 071                         | Etoricoxib, 30mg/d, oral, OD          | 214 | 63 | 30% | 8  | 41% | NR | NR   | Yes | Yes | NR  |
|                   |                                      | Ibuprofen, 2400mg/d, oral, TID        | 210 | 61 | 30% | 8  |     |    |      |     |     |     |

|                       |    |                                                |     |    |     |    |     |    |    |     |     |     |
|-----------------------|----|------------------------------------------------|-----|----|-----|----|-----|----|----|-----|-----|-----|
|                       |    | Placebo                                        | 104 | 60 | 28% | 7  |     |    |    |     |     |     |
| Sheldon 2005          | NR | Celecoxib, 200mg/d, oral, OD                   | 393 | 60 | 37% | 7  | NR  | NR | EC | Yes | Yes | Yes |
|                       |    | Placebo                                        | 382 | 61 | 39% | 7  |     |    |    |     |     |     |
| Biegert 2004          | NR | Diclofenac, 100mg/d, oral, BID, enteric coated | 43  | 61 | 35% | 9  | NR  | NR | EC | NR  | Yes | No  |
|                       |    | Placebo                                        | 41  | 62 | 39% | 11 |     |    |    |     |     |     |
| Zhao 1999/Bensen 1999 | NR | Celecoxib, 100mg/d, oral, BID                  | 203 | 62 | 31% | 9  | NR  | NR | EC | NR  | Yes | Yes |
|                       |    | Celecoxib, 200mg/d, oral, BID                  | 197 | 62 | 27% | 10 |     |    |    |     |     |     |
|                       |    | Celecoxib, 400mg/d, oral, BID                  | 202 | 63 | 28% | 9  |     |    |    |     |     |     |
|                       |    | Naproxen, 1000mg/d, oral, BID                  | 198 | 62 | 29% | 10 |     |    |    |     |     |     |
|                       |    | Placebo                                        | 204 | 62 | 25% | 10 |     |    |    |     |     |     |
| DeLemos 2011          | NR | Celecoxib 200 mg/d, oral, OD                   | 203 | 60 | 35% | 8  | NR  | NR | EC | NR  | Yes | NR  |
|                       |    | Placebo                                        | 202 | 59 | 32% | 8  |     |    |    |     |     |     |
| Fleischmann 2005      | NR | Celecoxib, 200mg/d, oral, OD                   | 444 | 61 | 33% | 7  | NR  | NR | NR | No  | Yes | Yes |
|                       |    | Placebo                                        | 231 | 62 | 34% | 7  |     |    |    |     |     |     |
| Davies 1999           | NR | Ibuprofen, 2400mg/d, oral, TID                 | 54  | 61 | 37% | 8  | NR  | NR | EC | NR  | NR  | Yes |
|                       |    | Placebo                                        | 50  | 62 | 36% | 8  |     |    |    |     |     |     |
| Lehmann 2005          | NR | Celecoxib, 200mg/d, oral, OD                   | 420 | 63 | 32% | 4  | NR  | NR | EC | Yes | Yes | Yes |
|                       |    | Placebo                                        | 424 | 62 | 28% | 4  |     |    |    |     |     |     |
| Altman 1998           | NR | Naproxen, 1000mg/d, oral, BID                  | 113 | 63 | 43% | NR | NR  | NR | NR | NR  | NR  | Yes |
|                       |    | Placebo                                        | 115 | 65 | 47% |    |     |    |    |     |     |     |
| Puopolo 2007          | NR | Etoricoxib, 30mg/d, oral,                      | 224 | 62 | 22% | 7  | 46% | NR | 4% | Yes | Yes | Yes |

|                          |                        |                                |     |      |     |    |    |     |       |     |     |     |
|--------------------------|------------------------|--------------------------------|-----|------|-----|----|----|-----|-------|-----|-----|-----|
|                          |                        | OD                             |     |      |     |    |    |     |       |     |     |     |
|                          |                        | Ibuprofen, 2400mg/d, oral, TID | 213 | 62   | 26% | 7  |    |     |       |     |     |     |
|                          |                        | Placebo                        | 111 | 64   | 24% | 7  |    |     |       |     |     |     |
| Hochberg 2011/Cryer 2011 | Study 307 (PN400-307)  | Celecoxib, 200mg/d, oral, OD   | 242 | 62   | 39% | NR | NR | 14% | NR    | No  | Yes | Yes |
|                          |                        | Placebo                        | 124 | 62   | 34% |    |    | 18% |       |     |     |     |
|                          | Study 309 (PN400-309)  | Celecoxib, 200 mg/d, oral, OD  | 244 | 62   | 37% | NR | NR | 17% | NR    | No  | Yes | Yes |
|                          |                        | Placebo                        | 122 | 62   | 37% |    |    | 9%  |       |     |     |     |
| Williams 2001            | NR                     | Celecoxib, 200mg/d, oral, BID  | 243 | 62   | 31% | 10 | NR | NR  | EC    | NR  | Yes | Yes |
|                          |                        | Celecoxib, 200mg/d, oral, OD   | 231 | 61   | 31% | 9  |    |     |       |     |     |     |
|                          |                        | Placebo                        | 244 | 61   | 27% | 10 |    |     |       |     |     |     |
| Leung 2002               | NR                     | Etoricoxib, 60mg, oral, OD     | 224 | 63   | 23% | 6  | NR | NR  | NR    | Yes | NR  | Yes |
|                          |                        | Naproxen, 1000mg/d, oral, BID  | 221 | 63   | 22% | 6  |    |     |       |     |     |     |
|                          |                        | Placebo                        | 56  | 64   | 18% | 6  |    |     |       |     |     |     |
| Makarowski 2002          | NR                     | Naproxen, 100mg/d, oral, BID   | 118 | 63   | 31% | 5  | NR | NR  | 9%    | NR  | Yes | NR  |
|                          |                        | Placebo                        | 118 | 62   | 31% | 6  |    |     | 11%   |     |     |     |
| Kivitz 2001              | NR                     | Celecoxib, 100mg/d, oral, BID  | 216 | 62   | 35% | 7  | NR | NR  | 9-18% | NR  | Yes | Yes |
|                          |                        | Celecoxib, 200mg/d, oral, BID  | 207 | 62   | 35% | 7  |    |     |       |     |     |     |
|                          |                        | Celecoxib, 400mg/d, oral, BID  | 213 | 61   | 33% | 7  |    |     |       |     |     |     |
|                          |                        | Naproxen, 1000mg/d, oral, BID  | 207 | 64   | 34% | 7  |    |     |       |     |     |     |
|                          |                        | Placebo                        | 218 | 64   | 33% | 8  |    |     |       |     |     |     |
| Boswell 2008             | Study A (GSK protocol) | Celecoxib, 200mg/d, oral,      | 109 | 63,3 | 36% | 7  | NR | NR  | EC    | Yes | NR  | Yes |

|                      |                                       |                                                                                  |     |      |     |    |    |    |     |     |     |     |
|----------------------|---------------------------------------|----------------------------------------------------------------------------------|-----|------|-----|----|----|----|-----|-----|-----|-----|
|                      | CXA20005)                             | OD                                                                               |     |      |     |    |    |    |     |     |     |     |
|                      |                                       | Placebo                                                                          | 107 | 63,5 | 29% | 6  |    |    |     |     |     |     |
|                      | Study B<br>(GSK protocol<br>CXA30007) | Celecoxib,<br>200mg/d, oral,<br>OD                                               | 185 | 59,7 | 33% | 9  | NR | NR | EC  | Yes | No  | Yes |
|                      |                                       | Placebo                                                                          | 186 | 60,5 | 27% | 8  |    |    |     |     |     |     |
| Sandelin<br>1997     | NR                                    | Diclofenac,<br>100mg/d, oral,<br>BID, combined<br>with placebo<br>gel, 9g/d, TID | 78  | 61   | 27% | NR | NR | NR | EC  | NR  | NR  | NR  |
|                      |                                       | Placebo gel<br>and tablet                                                        | 79  | 61   | 30% |    |    |    |     |     |     |     |
| Birbara 2006         | NR (Study 1)                          | Celecoxib,<br>200mg/d, oral,<br>OD                                               | 157 | 61   | 26% | NR | NR | NR | NR  | NR  | Yes | Yes |
|                      |                                       | Placebo                                                                          | 78  | 61   | 28% |    |    |    |     |     |     |     |
|                      | NR (Study 2)                          | Celecoxib,<br>200mg/d, oral,<br>OD                                               | 169 | 61   | 35% | NR | NR | NR | NR  | NR  | Yes | Yes |
|                      |                                       | Placebo                                                                          | 85  | 60   | 29% |    |    |    |     |     |     |     |
| Case 2003            | NR                                    | Diclofenac<br>sodium, 150<br>mg/d, oral, BID                                     | 25  | 63   | 40% | NR | NR | NR | EC  | NR  | No  | No  |
|                      |                                       | Acetaminophen<br>, 4000 mg/d,<br>oral, QID                                       | 29  | 62   | 48% |    |    |    |     |     |     |     |
|                      |                                       | Placebo                                                                          | 28  | 62   | 61% |    |    |    |     |     |     |     |
| Schnitzer<br>2005c-1 | NR                                    | Diclofenac, 150<br>mg/d, oral, BID                                               | 94  | 60   | 32% | 6  | NR | NR | EC  | No  | Yes | Yes |
|                      |                                       | Placebo                                                                          | 97  | 62   | 33% | 8  |    |    |     |     |     |     |
| Schnitzer<br>2005c-2 | NR                                    | Diclofenac, 150<br>mg/d, oral, BID                                               | 91  | 54   | 23% | 9  | NR | NR | EC  | No  | Yes | Yes |
|                      |                                       | Placebo                                                                          | 99  | 55   | 31% | 9  |    |    |     |     |     |     |
| Kivitz 2002          |                                       | Naproxen,<br>1000 mg/d,<br>oral, BID                                             | 205 | 60   | 37% | 9  | NR | NR | 15% | No  | Yes | NR  |
|                      |                                       | Placebo                                                                          | 205 | 60   | 36% | 8  |    |    | 10% |     |     |     |
| Geusens<br>2004      | NR                                    | Naproxen,<br>1000mg/d, oral,<br>BID                                              | 279 | 54   | 21% | 11 | NR | NR | EC  | No  | Yes | Yes |
|                      |                                       | Placebo                                                                          | 284 | 53   | 21% | 9  |    |    |     |     |     |     |

|           |    |                                      |     |    |     |    |    |    |    |    |    |     |
|-----------|----|--------------------------------------|-----|----|-----|----|----|----|----|----|----|-----|
| Saag 2000 | NR | Ibuprofen,<br>2400mg/d, oral,<br>TID | 221 | 61 | 26% | 10 | NR | NR | EC | No | No | Yes |
|           |    | Placebo                              | 69  | 62 | 19% | 9  |    |    |    |    |    |     |

22854
