# Supplementary material for: High correlation of VAS pain scores after 2 and 6 weeks of treatment with VAS pain scores at 12 weeks in randomised controlled trials in rheumatoid arthritis and osteoarthritis: meta-analysis and implications
Source: PubMed Central journal article supplement (PMC4818534; doi:10.1186/s13075-016-0972-7), 2016-03-31
Supplement: 13075_2016_972_MOESM4_ESM.pdf [file 13075_2016_972_MOESM4_ESM.pdf]

| Paper ID | Study ID | Arm ID | Author.Year     | Treatments                                    | N_ALL | CFB_2_m | CFB_2_se | N_6 | CFB_6_m | CFB_6_se | N_12 | CFB_12_m | CFB_12_se |
|----------|----------|--------|-----------------|-----------------------------------------------|-------|---------|----------|-----|---------|----------|------|----------|-----------|
| 1        | 1        | 1      | Gibofsky 2003   | Placebo, oral, OD, 6 weeks                    | 98    | -15.00  | 2.77     | 91  | -21.20  | 2.88     | NA   | NA       | NA        |
|          |          | 2      |                 | Celecoxib, 200mg/d, oral, OD, 6 weeks         | 189   | -29.00  | 1.98     | 178 | -34.00  | 2.06     | NA   | NA       | NA        |
| 2        | 2        | 3      | Reginster 2007  | Part I: Naproxen, 1000mg/d, 500mg twice daily | 439   | -26.90  | 2.00     | NA  | -30.40  | 1.90     | 439  | -28.57   | 1.07      |
|          |          | 4      |                 | Part I: Etoricoxib, 60mg/d, OD                | 446   | -27.00  | 2.10     | NA  | -30.40  | 2.00     | 446  | -27.94   | 1.07      |
| 3        | 3        | 5      | Bingham 2007    | Placebo                                       | 127   | -7.70   | 2.05     | NA  | -13.30  | 2.30     | 126  | -15.70   | 2.30      |
|          |          | 6      |                 | Celecoxib, 200mg/d, oral, OD                  | 241   | -21.70  | 1.60     | NA  | -24.70  | 1.50     | 236  | -25.00   | 1.80      |
|          |          | 7      |                 | Etoricoxib, 30mg/d, oral, OD                  | 231   | -25.10  | 1.60     | NA  | -27.20  | 1.90     | 228  | -28.90   | 1.70      |
| 3        | 4        | 8      | Bingham 2007    | Placebo                                       | 117   | -11.30  | 2.30     | NA  | -16.30  | 2.40     | 112  | -16.40   | 2.60      |
|          |          | 9      |                 | Celecoxib, 200mg/d, oral, OD                  | 247   | -23.50  | 1.60     | NA  | -27.10  | 1.70     | 246  | -28.00   | 1.80      |
|          |          | 10     |                 | Etoricoxib, 30mg/d, oral, OD                  | 244   | -23.90  | 1.50     | NA  | -27.70  | 1.60     | 243  | -27.70   | 1.80      |
| 4        | 5        | 11     | Baerwald 2010   | Placebo                                       | 331   | -11.60  | 1.37     | NA  | -15.80  | 1.60     | 331  | -17.97   | 1.68      |
|          |          | 12     |                 | Naproxen, 1000mg/d, oral, BID                 | 156   | -23.90  | 1.79     | NA  | -26.70  | 2.10     | 156  | -24.31   | 2.23      |
| 5        | 6        | 13     | Day 2000        | Placebo                                       | 74    | -17.90  | 2.04     | 74  | -18.92  | 2.40     | NA   | NA       | NA        |
|          |          | 14     |                 | Ibuprofen, 2400mg, NA, 800mg 3x per day       | 244   | -32.90  | 1.02     | 249 | -33.55  | 1.40     | NA   | NA       | NA        |
| 6        | 7        | 15     | Schnitzer 2005a | Placebo                                       | 104   | -21.80  | 2.59     | 104 | -26.00  | 2.69     | NA   | NA       | NA        |
|          |          | 16     |                 | Naproxen, 1000mg/d, oral,                     | 117   | -34.80  | 2.44     | 117 | -37.90  | 2.54     | NA   | NA       | NA        |

|    |    |    |                 |                                             |     |        |      |     |        |      |     |        |      |
|----|----|----|-----------------|---------------------------------------------|-----|--------|------|-----|--------|------|-----|--------|------|
|    |    |    |                 | 500mg twice daily                           |     |        |      |     |        |      |     |        |      |
| 7  | 8  | 17 | Sowers 2005     | Celecoxib 200mg/d, once daily               | 136 | NA     | NA   | 136 | -13.20 | 1.90 | 136 | -15.20 | 2.00 |
|    |    | 18 |                 | Naproxen 1000mg/d, 500mg twice daily        | 128 | NA     | NA   | 128 | -12.80 | 2.00 | 128 | -15.10 | 2.10 |
| 8  | 9  | 19 | Schnitzer 2004  | Placebo                                     | 97  | -12.40 | 2.69 | 96  | -16.80 | 2.80 | NA  | NA     | NA   |
|    |    | 20 |                 | Diclofenac, 150mg/d, oral, 75mg twice daily | 94  | -31.70 | 2.74 | 93  | -33.40 | 2.85 | NA  | NA     | NA   |
| 9  | 10 | 21 | Tannenbaum 2004 | Placebo                                     | 243 | -9.10  | 1.24 | 243 | -18.50 | 1.76 | 243 | -19.80 | 1.67 |
|    |    | 22 |                 | Celecoxib, 200mg/d, 200mg once daily        | 481 | -17.50 | 0.93 | 481 | -25.00 | 1.25 | 481 | -25.20 | 1.13 |
| 10 | 11 | 23 | Schnitzer 2010  | Placebo b.i.d.                              | 221 | -19.60 | 1.66 | NA  | -23.00 | 1.70 | 221 | -24.08 | 1.84 |
|    |    | 24 |                 | Naproxen, 1000mg/d, 500mg, b.i.d.           | 227 | -32.30 | 1.45 | NA  | -35.80 | 1.80 | 226 | -36.51 | 1.81 |
| 11 | 12 | 25 | Dahlberg 2009   | Celecoxib, 200mg, oral, OD                  | 458 | NA     | NA   | 458 | -12.00 | 1.28 | 458 | -11.00 | 1.19 |
|    |    | 26 |                 | Diclofenac, 100mg, oral, BID                | 458 | NA     | NA   | 458 | -13.00 | 1.28 | 458 | -10.00 | 1.19 |
| 12 | 13 | 27 | Schnitzer 2011b | Placebo (pooled arms)                       | 257 | -15.20 | 1.65 | 256 | -19.00 | 1.72 | 256 | -20.40 | 1.62 |
|    |    | 28 |                 | Naproxen (1000 mg/d), 500 mg bid            | 254 | -27.60 | 1.66 | 254 | -30.90 | 1.72 | 254 | -29.50 | 1.62 |
| 13 | 14 | 29 | Smugar 2006     | Placebo                                     | 150 | -23.10 | 2.00 | 146 | -17.60 | 1.90 | NA  | NA     | NA   |
|    |    | 30 |                 | Celecoxib, 200mg/d, oral, OD                | 456 | -34.20 | 1.20 | 447 | -33.00 | 1.00 | NA  | NA     | NA   |
| 13 | 15 | 31 | Smugar 2006     | Placebo                                     | 151 | -18.30 | 2.00 | 150 | -16.70 | 1.80 | NA  | NA     | NA   |
|    |    | 32 |                 | Celecoxib, 200mg/d, oral, OD                | 460 | -32.20 | 1.40 | 459 | -30.80 | 1.00 | NA  | NA     | NA   |
| 14 | 16 | 33 | Schnitzer 2011a | Placebo                                     | 416 | -20.60 | 1.29 | 416 | -23.30 | 1.35 | 416 | -24.40 | 1.24 |
|    |    | 34 |                 | Celecoxib, 200mg/d, oral, 200mg once        | 419 | -28.70 | 1.29 | 419 | -32.60 | 1.34 | 419 | -33.60 | 1.24 |

|    |    |    |                   |                                                |     |        |      |     |        |      |     |        |      |
|----|----|----|-------------------|------------------------------------------------|-----|--------|------|-----|--------|------|-----|--------|------|
|    |    |    |                   | daily                                          |     |        |      |     |        |      |     |        |      |
| 15 | 17 | 35 | Emery 2008        | Celecoxib, 200mg/d, oral, OD                   | 69  | NA     | NA   | 69  | -20.00 | 2.80 | 50  | -17.00 | 3.32 |
|    |    | 36 |                   | Diclofenac, 150mg/d, oral, TID                 | 72  | NA     | NA   | 72  | -35.00 | 3.20 | 48  | -30.00 | 3.80 |
| 16 | 18 | 37 | Gibofsky 2007     | Placebo                                        | 171 | NA     | NA   | 169 | -16.00 | 2.11 | 169 | -14.90 | 2.24 |
|    |    | 38 |                   | Naproxen 1000/d, oral, 500mg 2x daily          | 167 | NA     | NA   | 166 | -30.20 | 2.10 | 166 | -30.80 | 2.22 |
| 17 | 19 | 39 | McKenna 2001a     | Placebo                                        | 200 | -20.40 | 1.80 | 200 | -23.10 | 2.00 | NA  | NA     | NA   |
|    |    | 40 |                   | Celecoxib, 200mg/d, 100mg bid                  | 201 | -33.40 | 1.91 | 199 | -34.90 | 2.00 | NA  | NA     | NA   |
|    |    | 41 |                   | Diclofenac 150mg/d, 50mg TID                   | 199 | -35.50 | 1.94 | 199 | -36.80 | 2.00 | NA  | NA     | NA   |
| 18 | 20 | 42 | Williams 2000     | Placebo                                        | 232 | -12.30 | 1.74 | 231 | -14.00 | 1.81 | NA  | NA     | NA   |
|    |    | 43 |                   | Celecoxib, 200mg, oral, BID                    | 231 | -24.80 | 1.74 | 231 | -27.30 | 1.81 | NA  | NA     | NA   |
|    |    | 44 |                   | Celecoxib, 200mg, oral, once daily             | 223 | -25.90 | 1.77 | 222 | -27.30 | 1.84 | NA  | NA     | NA   |
| 19 | 21 | 45 | Bocanegra 1998    | Placebo                                        | 91  | -11.60 | 2.67 | 91  | -13.00 | 3.19 | NA  | NA     | NA   |
|    |    | 46 |                   | Diclofenac sodium, 150mg/d, oral, BID          | 154 | -26.70 | 2.28 | 154 | -28.70 | 2.48 | NA  | NA     | NA   |
| 20 | 22 | 47 | Wiesenhutter 2005 | Placebo                                        | 104 | -8.85  | 2.25 | 101 | -18.20 | 2.20 | 101 | -19.00 | 2.70 |
|    |    | 48 |                   | Etoricoxib, 30mg/d, oral, 30mg once daily      | 214 | -22.20 | 1.40 | 212 | -27.90 | 1.60 | 212 | -29.80 | 1.90 |
|    |    | 49 |                   | Ibuprofen, 2400mg/d, oral, 800mg 3 times daily | 210 | -22.00 | 1.60 | 209 | -25.90 | 1.50 | 209 | -27.00 | 2.10 |
| 21 | 23 | 50 | Schnitzer 2005b   | Celecoxib, 200 mg, once daily                  | 523 | -27.60 | 1.10 | 514 | -29.60 | 2.00 | NA  | NA     | NA   |
|    |    | 51 |                   | Acetaminophen 4000 mg, (1000mg QID)            | 269 | -24.10 | 1.40 | 264 | -24.60 | 1.80 | NA  | NA     | NA   |
| 22 | 24 | 52 | Sheldon 2005      | Placebo                                        | 382 | -13.90 | 1.35 | 382 | -18.80 | 1.41 | 382 | -18.10 | 1.31 |
|    |    | 53 |                   | Celecoxib 200 mg/d                             | 393 | -24.30 | 1.33 | 393 | -26.60 | 1.39 | 393 | -24.10 | 1.33 |

|    |    |    |                       |                                                |     |        |      |     |        |      |     |        |      |
|----|----|----|-----------------------|------------------------------------------------|-----|--------|------|-----|--------|------|-----|--------|------|
| 23 | 25 | 54 | Biegert 2004          | Placebo                                        | 41  | -6.00  | 4.12 | 41  | -5.00  | 3.60 | NA  | NA     | NA   |
|    |    | 55 |                       | Diclofenac, 100mg/d, oral, BID, enteric coated | 43  | -23.00 | 4.02 | 43  | -23.00 | 3.00 | NA  | NA     | NA   |
| 24 | 26 | 56 | Zhao 1999/Bensen 1999 | Placebo                                        | 203 | -13.50 | 1.85 | 203 | -18.60 | 1.93 | 203 | -17.00 | 1.78 |
|    |    | 57 |                       | Celecoxib 100mg, 50mg b.i.d.                   | 203 | -17.50 | 1.85 | 203 | -17.60 | 1.93 | 203 | -15.60 | 1.78 |
|    |    | 58 |                       | Celecoxib 200mg, 100mg b.i.d.                  | 197 | -29.00 | 1.88 | 197 | -29.30 | 1.96 | 197 | -27.00 | 1.81 |
|    |    | 59 |                       | Celecoxib 400mg, 200mg b.i.d.                  | 202 | -26.60 | 1.86 | 202 | -26.80 | 1.93 | 202 | -24.80 | 1.78 |
|    |    | 60 |                       | Naproxen 1000mg, 500mg b.i.d.                  | 198 | -28.90 | 1.87 | 198 | -29.10 | 1.95 | 198 | -25.00 | 1.80 |
| 25 | 27 | 61 | DeLemos 2011          | Placebo                                        | 202 | NA     | NA   | 200 | -23.76 | 1.94 | 200 | -18.98 | 1.78 |
|    |    | 62 |                       | Celecoxib 200 mg/d, oral, OD                   | 203 | NA     | NA   | 202 | -32.18 | 1.93 | 202 | -26.00 | 1.80 |
| 26 | 28 | 63 | Fleischmann 2006      | Placebo OD                                     | 231 | -15.90 | 1.60 | 231 | -19.70 | 1.81 | 231 | -21.30 | 1.73 |
|    |    | 64 |                       | Celecoxib 200 mg/d, OD                         | 444 | -20.30 | 1.09 | 444 | -25.50 | 1.30 | 444 | -27.40 | 1.32 |
| 27 | 29 | 65 | Davies 1999           | Placebo                                        | 50  | -34.40 | 3.85 | 46  | -5.70  | 4.05 | NA  | NA     | NA   |
|    |    | 66 |                       | Ibuprofen, 2400mg/d, oral, TID                 | 54  | -33.80 | 3.85 | 49  | -16.20 | 3.92 | NA  | NA     | NA   |
| 28 | 30 | 67 | Lehmann 2005          | Placebo                                        | 424 | -11.30 | 0.91 | 424 | -20.40 | 1.33 | 424 | -21.40 | 1.16 |
|    |    | 68 |                       | Celecoxib 200 mg, oral, 200mg od               | 420 | -17.50 | 0.98 | 419 | -26.70 | 1.34 | 420 | -26.60 | 1.15 |
| 29 | 31 | 69 | Altman 1998           | Placebo                                        | 115 | -20.00 | 2.09 | 149 | -30.00 | 2.25 | 129 | NA     | NA   |
|    |    | 70 |                       | Naproxen, 1000mg/d, oral, BID                  | 113 | -21.00 | 2.13 | 143 | -29.00 | 2.30 | 125 | NA     | NA   |
| 30 | 32 | 71 | Puopolo 2007          | Placebo                                        | 111 | -12.20 | 2.20 | NA  | -17.80 | 2.60 | 109 | -16.47 | 2.08 |
|    |    | 72 |                       | Etoricoxib, 30mg/d, 30mg qd                    | 224 | -22.20 | 1.70 | NA  | -30.00 | 2.10 | 220 | -28.14 | 1.58 |
|    |    | 73 |                       | Ibuprofen, 2400mg/d,Q99                        | 213 | -21.60 | 1.70 | NA  | -24.40 | 2.00 | 211 | -24.10 | 1.58 |

|    |    |    |                          |                                                      |     |        |      |     |        |      |     |        |      |
|----|----|----|--------------------------|------------------------------------------------------|-----|--------|------|-----|--------|------|-----|--------|------|
|    |    |    |                          | 800mg, tid                                           |     |        |      |     |        |      |     |        |      |
| 31 | 33 | 74 | McKenna 2001b            | Placebo                                              | 60  | -23.80 | 3.41 | 60  | -25.00 | 3.60 | NA  | NA     | NA   |
|    |    | 75 |                          | Celecoxib, 200mg/d, oral, once daily                 | 63  | -32.90 | 3.32 | 63  | -39.00 | 3.60 | NA  | NA     | NA   |
| 32 | 34 | 76 | Hochberg 2011/Cryer 2011 | Placebo                                              | 124 | NA     | NA   | 124 | -32.10 | 2.47 | 108 | -35.60 | 2.64 |
|    |    | 77 |                          | Celecoxib 200 mg/d, oral, QD                         | 242 | NA     | NA   | 242 | -40.50 | 1.77 | 221 | -41.80 | 1.85 |
| 32 | 35 | 78 | Hochberg 2011/Cryer 2011 | Placebo                                              | 122 | NA     | NA   | 122 | -35.20 | 2.49 | 106 | -38.40 | 2.67 |
|    |    | 79 |                          | Celecoxib 200 mg/d, oral, QD                         | 244 | NA     | NA   | 244 | -39.20 | 1.76 | 220 | -42.90 | 1.85 |
| 33 | 36 | 80 | Williams 2001            | Placebo                                              | 244 | -12.40 | 1.69 | 243 | -15.00 | 1.76 | NA  | NA     | NA   |
|    |    | 81 |                          | Celecoxib, 200mg/d, 100mg b.i.d.                     | 243 | -22.50 | 1.70 | 241 | -21.20 | 1.77 | NA  | NA     | NA   |
|    |    | 82 |                          | Celecoxib, 200mg/d, 200mg q.d.                       | 231 | -21.10 | 1.74 | 231 | -23.50 | 1.81 | NA  | NA     | NA   |
| 34 | 37 | 83 | Leung 2002               | Placebo                                              | 56  | -13.20 | 2.90 | NA  | -16.90 | 3.10 | 56  | -15.33 | 2.74 |
|    |    | 84 |                          | Naproxen 1000mg/d, 500mg twice daily                 | 221 | -25.90 | 1.60 | NA  | -25.10 | 1.90 | 221 | -25.32 | 1.44 |
|    |    | 85 |                          | Etoricoxib 60mg once daily                           | 224 | -24.50 | 1.50 | NA  | -25.70 | 1.80 | 224 | -25.76 | 1.44 |
| 35 | 38 | 86 | Makarowsky 2002          | Placebo                                              | 118 | -14.40 | 2.44 | 117 | -16.00 | 2.54 | 117 | -15.20 | 2.34 |
|    |    | 87 |                          | Naproxen (1000mg/d), 500mg b.i.d                     | 118 | -27.30 | 2.43 | 118 | -26.10 | 2.53 | 118 | -22.00 | 2.33 |
| 36 | 39 | 88 | Kivitz 2001              | Placebo                                              | 218 | -11.80 | 1.79 | 217 | -13.20 | 1.86 | 217 | -11.10 | 1.72 |
|    |    | 89 |                          | Celecoxib 100 mg/day (in divided doses, twice daily) | 216 | -19.70 | 1.79 | 216 | -21.50 | 1.87 | 216 | -19.00 | 1.73 |
|    |    | 90 |                          | Celecoxib 200 mg/day (in divided doses, twice daily) | 207 | -24.40 | 1.83 | 207 | -25.10 | 1.91 | 207 | -23.30 | 1.76 |
|    |    | 91 |                          | Celecoxib 400 mg/day (in divided                     | 213 | -24.40 | 1.81 | 213 | -23.90 | 1.88 | 213 | -19.30 | 1.74 |

|    |    |     |                  |                                                                      |     |        |      |     |        |      |     |        |      |
|----|----|-----|------------------|----------------------------------------------------------------------|-----|--------|------|-----|--------|------|-----|--------|------|
|    |    |     |                  | doses, twice daily)                                                  |     |        |      |     |        |      |     |        |      |
|    |    | 92  |                  | Naproxen 1000 mg/day (in divided doses, twice daily)                 | 207 | -26.50 | 1.83 | 207 | -24.80 | 1.91 | 207 | -22.30 | 1.76 |
| 37 | 40 | 93  | Boswell 2008     | Placebo                                                              | 107 | -11.90 | 2.00 | 101 | -16.90 | 1.90 | NA  | NA     | NA   |
|    |    | 94  |                  | Celecoxib, 200mg/d, oral, OD                                         | 109 | -14.10 | 1.90 | 105 | -19.60 | 2.00 | NA  | NA     | NA   |
| 37 | 41 | 95  | Boswell 2008     | Placebo                                                              | 186 | -14.80 | 1.50 | NA  | -24.40 | 2.10 | 167 | -21.70 | 1.70 |
|    |    | 96  |                  | Celecoxib, 200mg/d, oral, OD                                         | 185 | -23.10 | 1.50 | NA  | -28.10 | 1.90 | 163 | -28.00 | 1.80 |
| 38 | 42 | 97  | Sandelin 1997    | Placebo gel and tablet                                               | 79  | -13.00 | 2.97 | 79  | -21.00 | 3.09 | NA  | NA     | NA   |
|    |    | 98  |                  | Diclofenac, 100mg/d, oral, BID, combined with placebo gel, 9g/d, TID | 78  | -17.00 | 2.99 | 78  | -22.00 | 3.11 | NA  | NA     | NA   |
| 39 | 43 | 99  | Birbara2006      | Placebo                                                              | 78  | -17.60 | 5.60 | 78  | -19.24 | 5.90 | NA  | NA     | NA   |
|    |    | 100 |                  | Celecoxib 200 mg/d, oral, 200mg once daily                           | 157 | -25.20 | 4.20 | 156 | -27.30 | 4.50 | NA  | NA     | NA   |
| 39 | 44 | 101 | Birbara2006      | Placebo                                                              | 85  | -18.90 | 5.80 | 81  | -20.95 | 6.10 | NA  | NA     | NA   |
|    |    | 102 |                  | Celecoxib 200 mg/d, oral, 200mg once daily                           | 169 | -24.70 | 4.50 | 164 | -28.51 | 4.70 | NA  | NA     | NA   |
| 40 | 45 | 103 | Case 2003        | Placebo                                                              | 28  | -0.30  | 0.74 | NA  | NA     | NA   | 28  | -3.06  | 3.73 |
|    |    | 104 |                  | Acetaminophen, (4000 mg/d), oral, QID                                | 29  | -0.94  | 0.80 | NA  | NA     | NA   | 29  | -4.76  | 3.09 |
|    |    | 105 |                  | Diclofenac Sodium, (150 mg/d), oral, BID                             | 25  | -12.04 | 0.97 | NA  | NA     | NA   | 25  | -10.78 | 3.17 |
| 41 | 46 | 106 | Schnitzer 2005-1 | Placebo                                                              | 96  | -14.10 | 2.69 | 96  | -19.00 | 2.80 | NA  | NA     | NA   |
|    |    | 107 |                  | Diclofenac, 150 mg/d, oral, BID                                      | 93  | -30.50 | 2.74 | 93  | -33.10 | 2.85 | NA  | NA     | NA   |

|    |    |     |                     |                                    |     |        |      |     |        |      |     |        |      |
|----|----|-----|---------------------|------------------------------------|-----|--------|------|-----|--------|------|-----|--------|------|
| 42 | 47 | 108 | Schnitzer<br>2005-2 | Placebo                            | 99  | -16.00 | 2.66 | 98  | -18.60 | 2.77 | NA  | NA     | NA   |
|    |    | 109 |                     | Diclofenac, 150<br>mg/d, oral, BID | 91  | -25.20 | 2.77 | 91  | -24.60 | 2.88 | NA  | NA     | NA   |
| 43 | 48 | 110 | Kivitz 2002         | Placebo                            | 205 | -21.19 | 1.84 | 205 | -23.92 | 1.94 | 205 | -25.97 | 2.07 |
|    |    | 111 |                     | Naproxen, 1000<br>mg/d, oral, BID  | 205 | -31.03 | 1.85 | 204 | -31.84 | 1.93 | 204 | -31.83 | 2.08 |
| 44 | 49 | 112 | Geusens 2004        | Placebo                            | 284 | -16.40 | 1.68 | 284 | NA     | NA   | 284 | -19.30 | 1.38 |
|    |    | 113 |                     | Naproxen,<br>1000mg/d, oral, BID   | 279 | -22.60 | 1.62 | 279 | NA     | NA   | 279 | -23.40 | 1.42 |
| 45 | 50 | 114 | Saag 2000           | Placebo                            | 69  | -11.70 | 2.87 | 69  | -15.10 | 2.90 | NA  | NA     | NA   |
|    |    | 115 |                     | Ibuprofen,<br>2400mg/d, oral, TID  | 221 | -24.80 | 1.60 | 221 | -27.40 | 1.62 | NA  | NA     | NA   |
